# Supplementary material for: Projected increases in magnitude and socioeconomic exposure of global droughts in 1.5 and 2 °C warmer climates
Source: Copernicus journal article supplement (doi:10.5194/hess-24-451-2020), 2020-01-28
Supplement: Supplementary file 1 [file hess-24-451-2020-supplement.pdf]

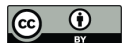

## *Supplement of*

# **Projected increases in magnitude and socioeconomic exposure of global droughts in 1.5 and 2 °C warmer climates**

**Lei Gu et al.**

*Correspondence to:* Jie Chen (jiechen@whu.edu.cn) and Jiabo Yin (jboyn@whu.edu.cn)

The copyright of individual parts of the supplement might differ from the CC BY 4.0 License.

---

## List of Supplementary Figures and Tables

Figure S1 GDP and Population under the 1.5°C and 2.0°C warming target

Figure S2 National population and GDP fraction exposing to more frequent severe droughts in 2.0°C relative to 1.5°C warming target

Figure S3 Drought exposures for 8 typical drought-prone countries under the 1.5°C warming target

Figure S4 Drought exposures for 8 typical drought-prone countries under the 2.0°C warming target

Figure S5 Projected changes of 20-, 50-, and 100-year joint return period of droughts under the 1.5°C warming level

Figure S6 Projected changes of 20-, 50-, and 100-year joint return period of droughts between the 1.5°C and 2.0°C warming level

Figure S7 National population and GDP fraction exposing to more frequent severe droughts under the 1.5°C warming level (based on the -0.8 threshold)

Figure S8 National population and GDP fraction exposing to more frequent severe droughts under the 2.0°C warming level (based on the -0.8 threshold)

Figure S9 Uncertainty for SPEI-3 changes under the 1.5°C warming target

Figure S10 Uncertainty for SPEI-3 changes between the 1.5°C and 2.0°C warming target

Figure S11 Uncertainty for drought duration and severity changes under the 1.5°C warming target

Figure S12 Uncertainty for drought duration and severity changes between the 1.5°C and 2.0°C warming target

Figure S13 Model uncertainty for changes of 50-year joint return period (JRP) under the 1.5°C warming target

Figure S14 Model uncertainty for changes of 50-year joint return period (JRP) between the 1.5°C and 2.0°C warming target

Figure S15 Projected changes in the mean and standard deviation of SPEI under the 1.5°C (a) and between the 1.5°C and 2.0°C (b) warming target at 2° spatial resolution

Figure S16 Projected changes in drought duration and severity under the 1.5°C (a) and between the 1.5°C and 2.0°C (b) warming target at 2° spatial resolution

Table S1 Summary statistic table for changes in major variables

Table S2 Several countries suffering decreasing population and GDP exposure

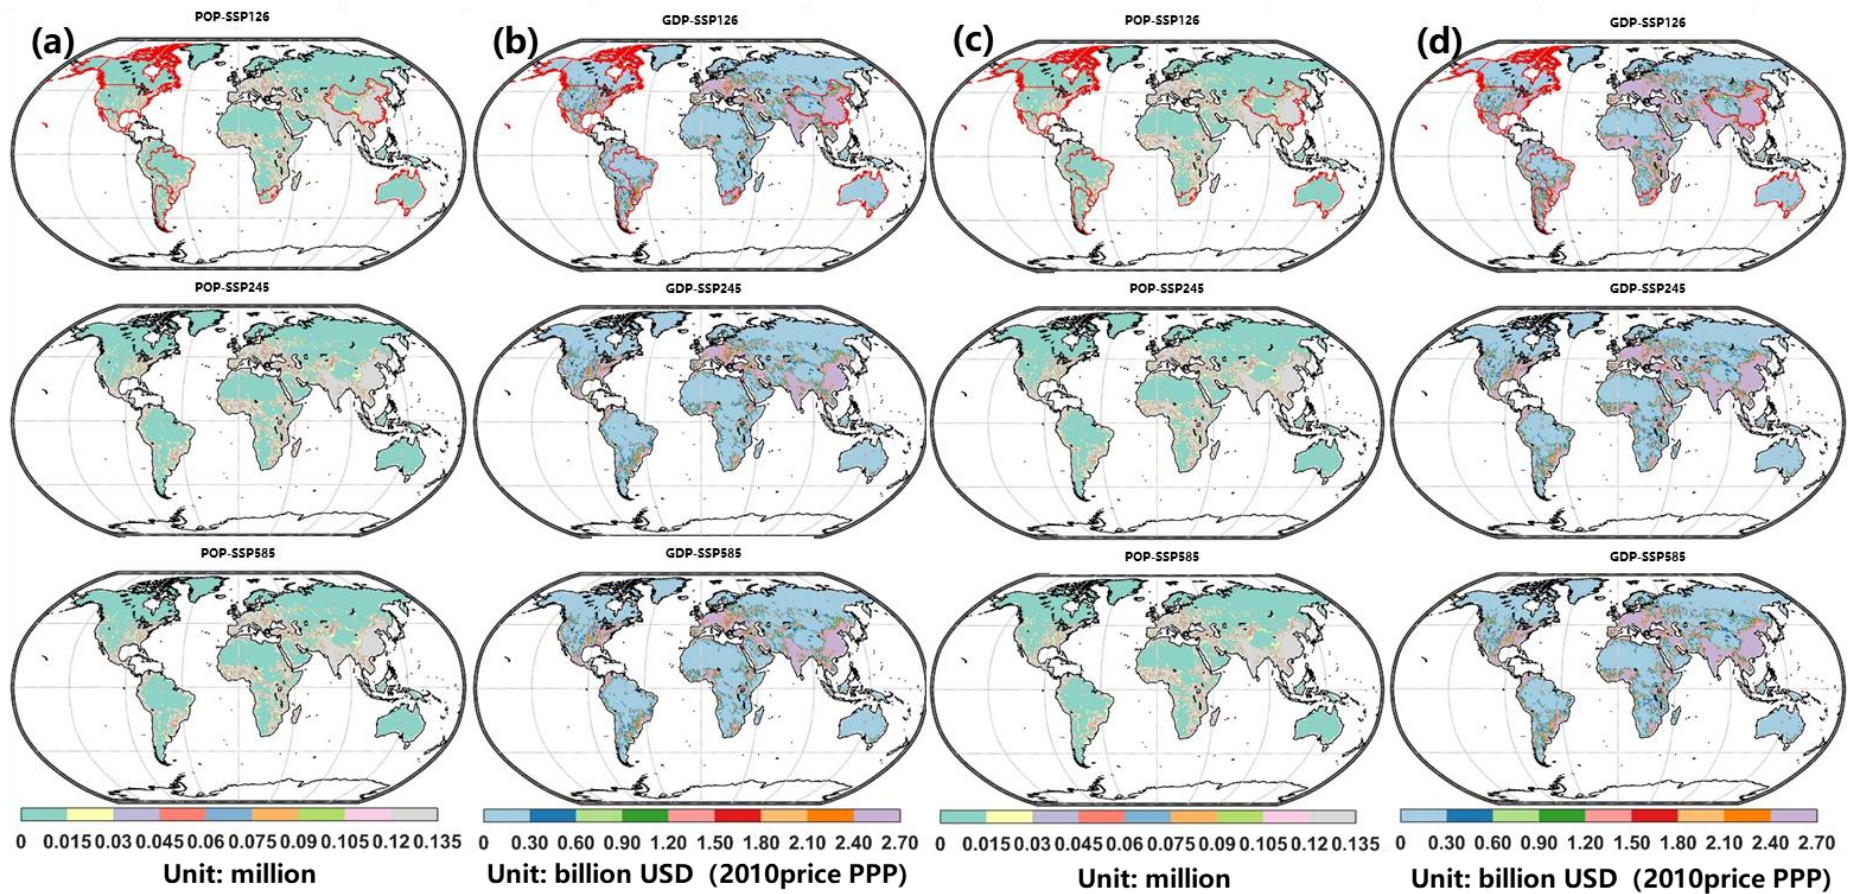

**Figure S1 GDP and Population under the 1.5°C and 2.0°C target**

Maps of the projected population (a,c) and GDP (b,d) scenarios for the 30-year 1.5°C warming period (a,b) and 2.0°C warming period (c,d) for the SSP126, SSP245, SSP585 scenarios. Red lines in the top panel mark the eight hotspot countries spanning over different socio-climatic regions in Section 3.5.

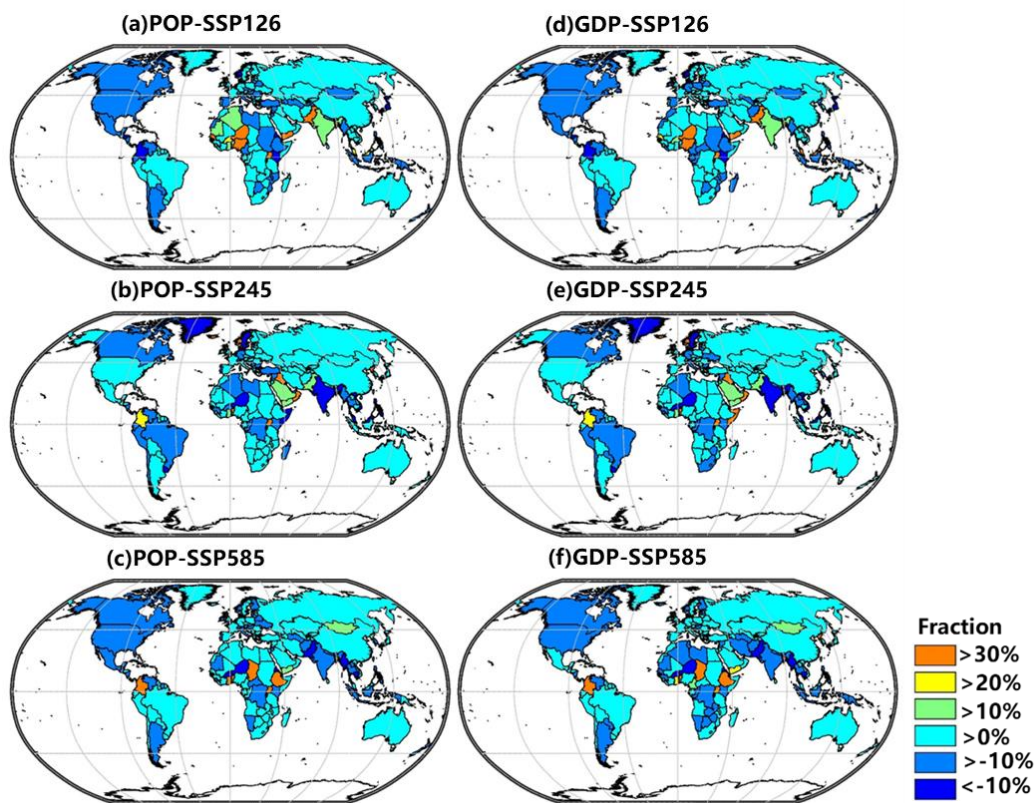

**Figure S2 National population and GDP fraction exposing to more frequent severe droughts in 2.0°C relative to 1.5°C warming target.**

Maps of relative population (a,c,e) and GDP (b,d,f) fractions that exposed to more frequent severe droughts at the national scale for SSP126, SSP245, SSP585 scenarios. The color-bar in the right side represents six ranks of the population and GDP fractions.

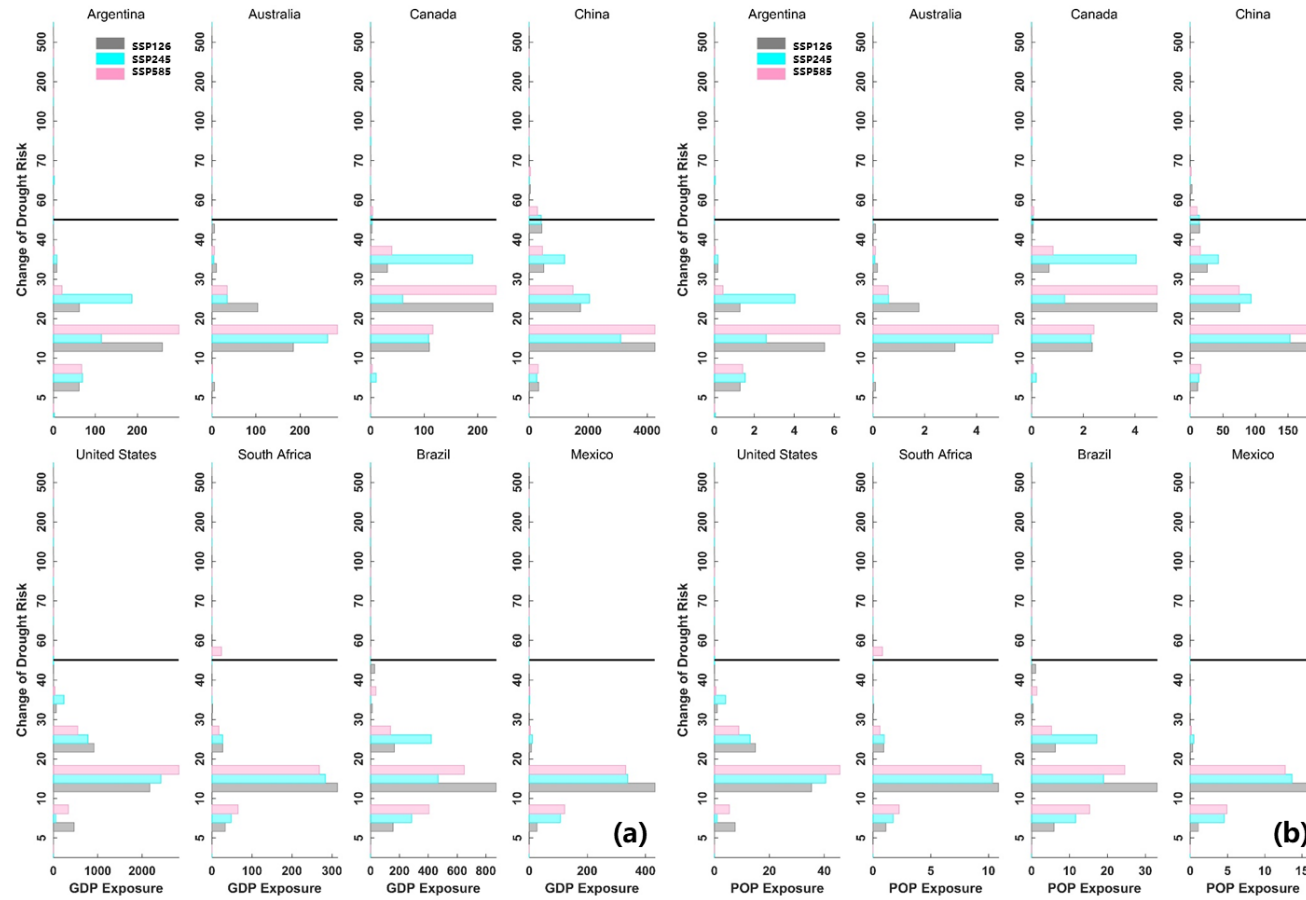

**Figure S3 Drought exposures for 8 typical drought-prone countries under the 1.5 °C warming target**

Projected GCMs median changes in joint 50-year return periods of droughts (duration and severity) as a function of GDP (a)/ POP (b) fraction for 8 typical countries suffering severe droughts from the historical period to the 1.5°C warming target under SSP126, SSP245, SSP585.

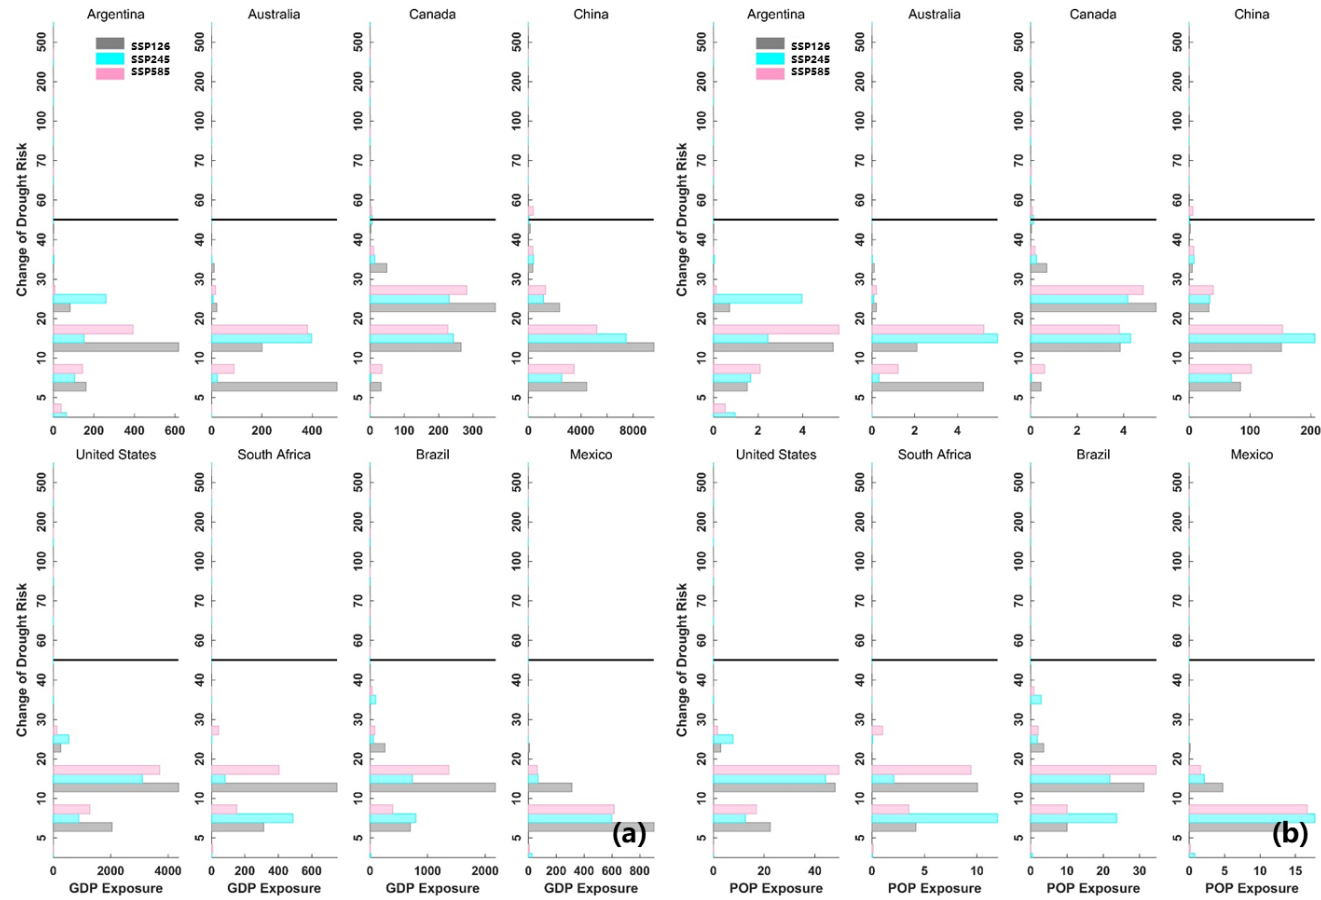

**Figure S4 Drought exposures for 8 typical drought-prone countries under the 2.0 °C warming target**

Projected GCMs median changes in joint 50-year return periods of droughts (duration and severity) as a function of GDP (a)/ POP (b) fraction for 8 typical countries suffering severe droughts from the historical period to the 2.0 °C warming target under SSP126, SSP245, SSP585.



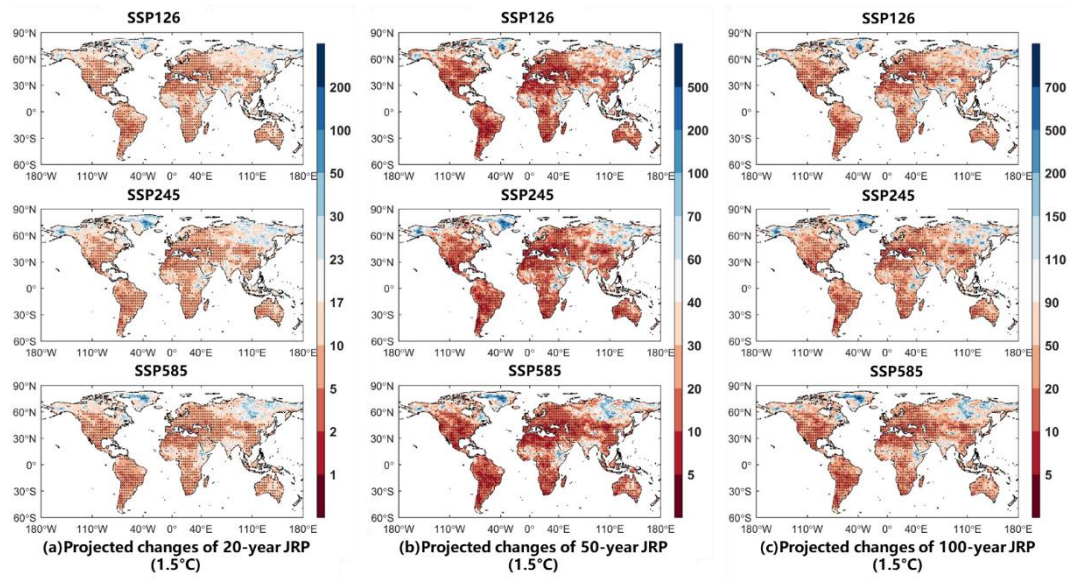

**Figure S5 Projected changes of 20-, 50-, and 100-year joint return period of droughts under the 1.5°C warming level.**

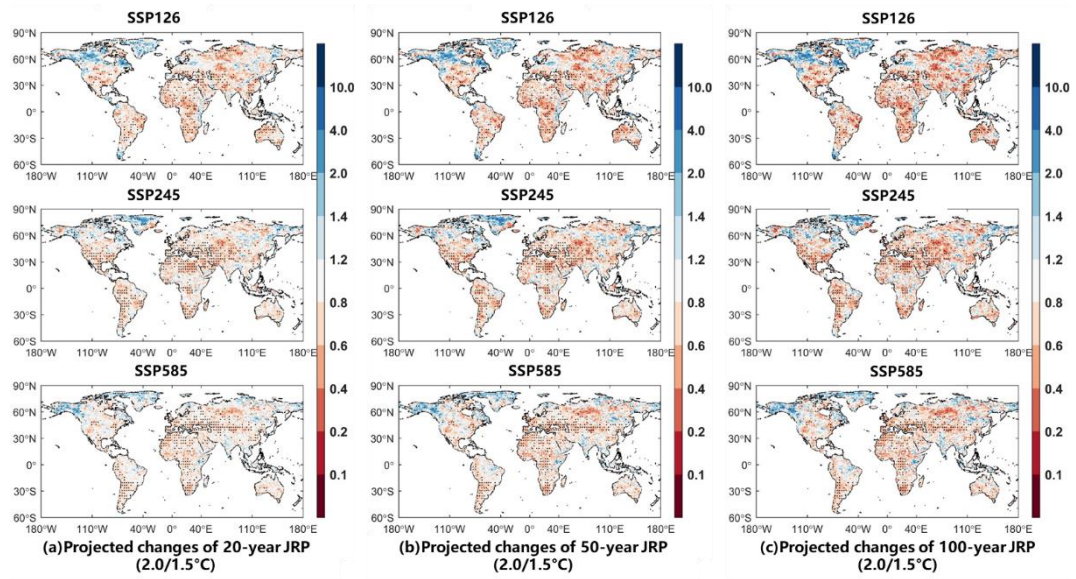

**Figure S6 Projected changes of 20-, 50-, and 100-year joint return period of droughts between the 1.5°C and 2.0°C warming level.**



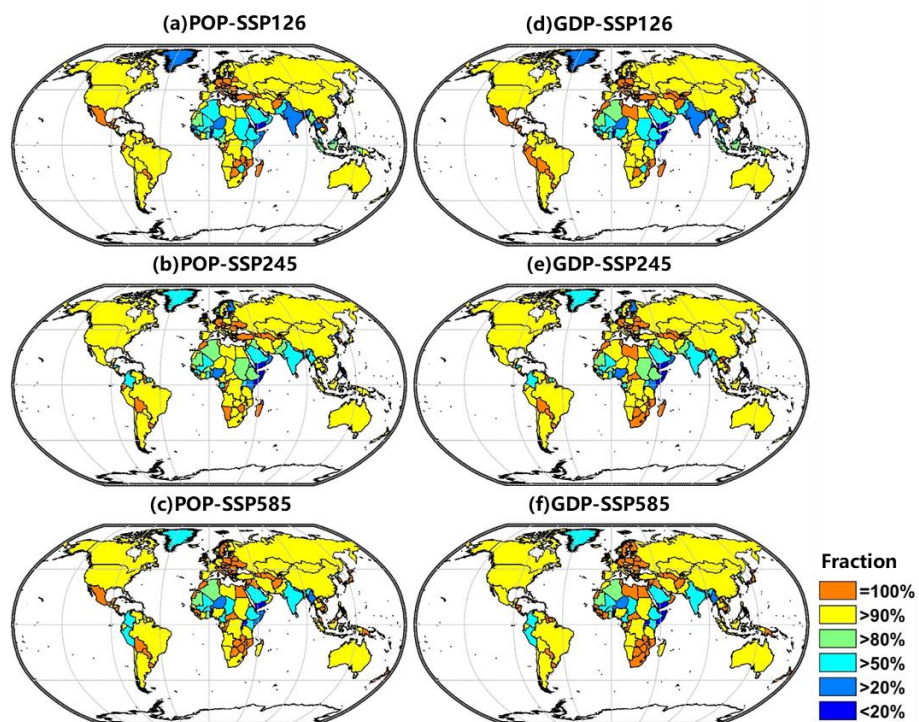

**Figure S7 National population and GDP fraction exposing to more frequent severe droughts under the 1.5°C warming level (based on the -0.8 threshold)**

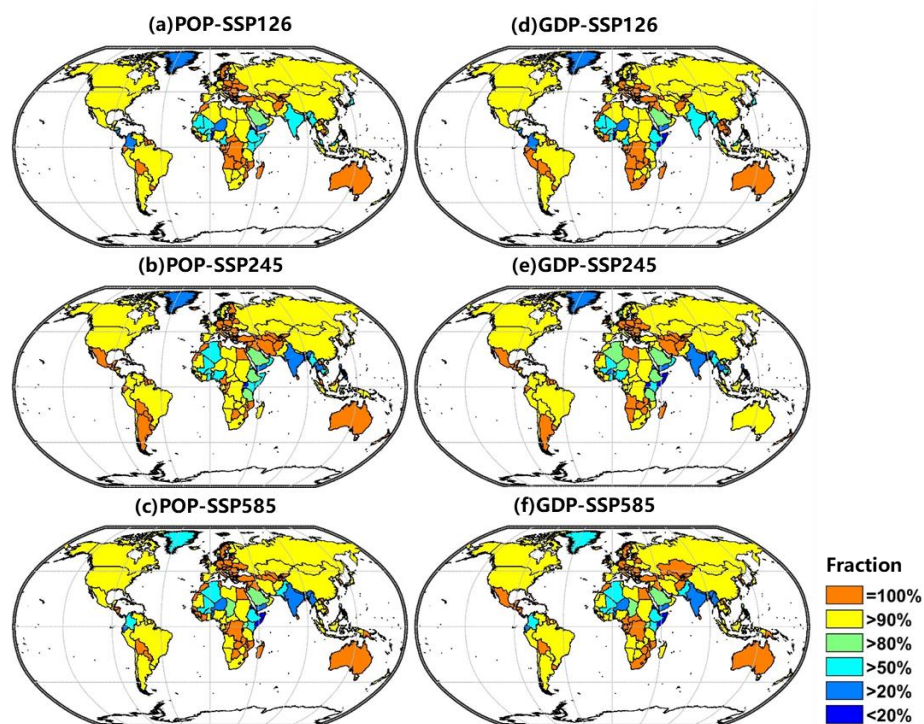

**Figure S8 National population and GDP fraction exposing to more frequent severe droughts under the 2.0°C warming level (based on the -0.8 threshold)**

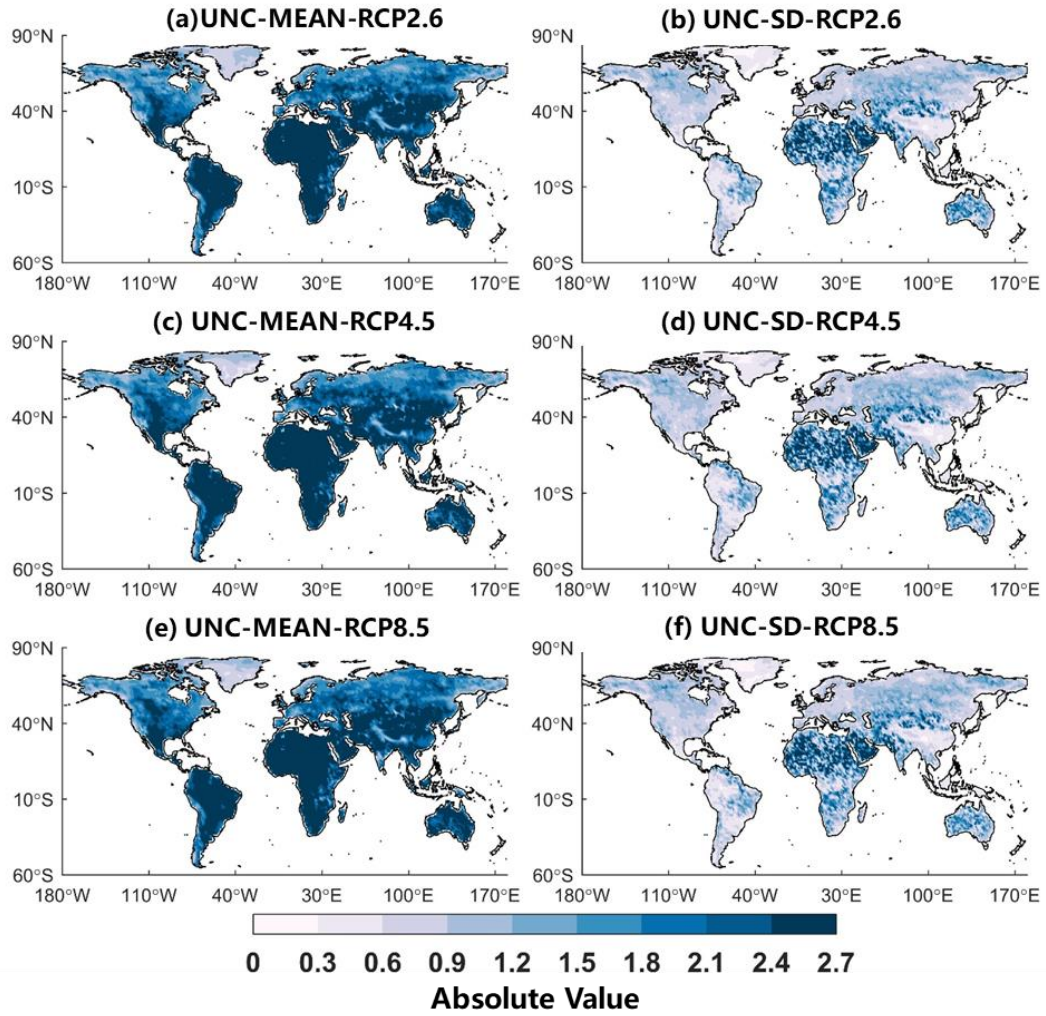

**Figure S9 Uncertainty for SPEI-3 changes under the 1.5°C warming target**

Maps of the projected uncertainty (measured by 5-95% confidence intervals) in SPEI-3 mean (MEAN) (a,c,e) and standard deviation (SD) (b,d,f) changes under the 1.5°C warming target relative to historical period (1976-2000) for RCP2.6, RCP4.5, RCP8.5 scenarios.

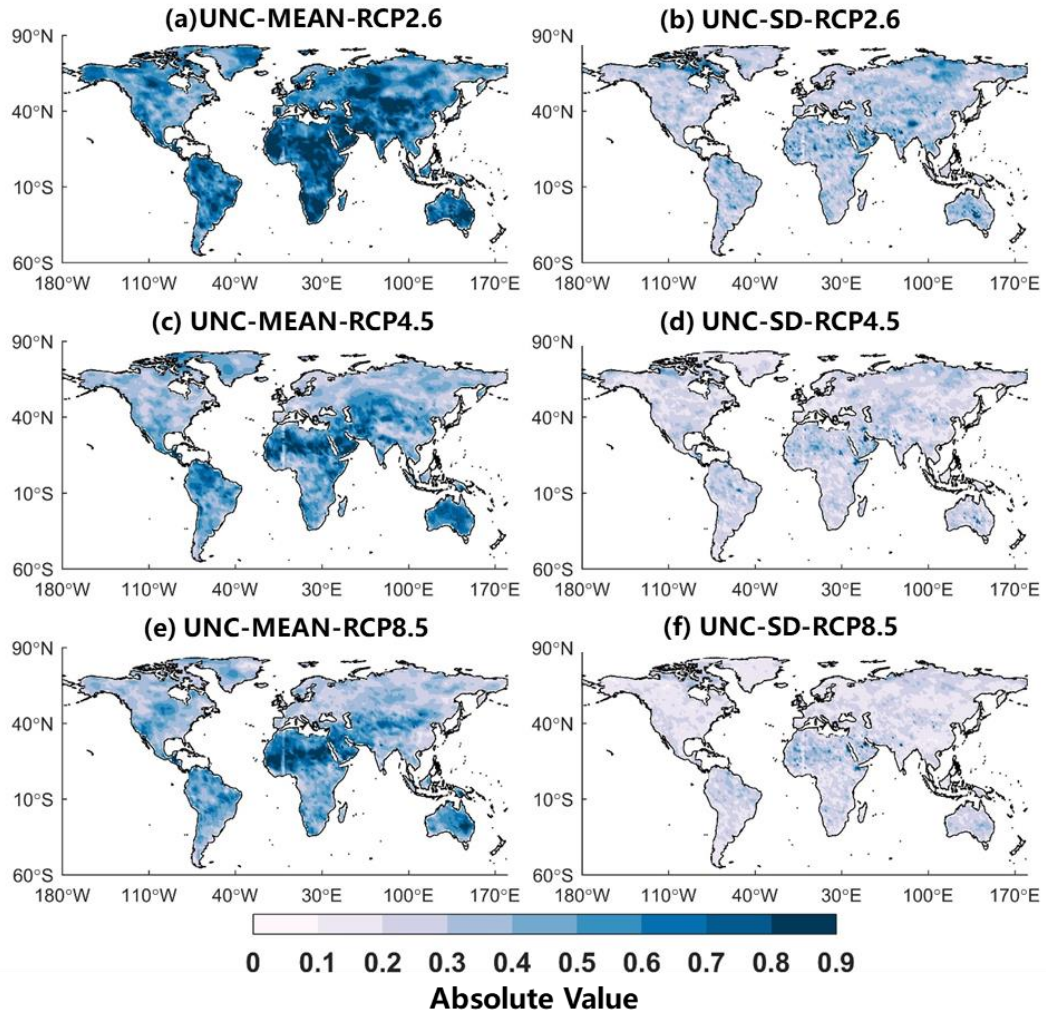

**Figure S10 Uncertainty for SPEI-3 changes between the 1.5°C and 2.0°C warming target**  
 Maps of the projected uncertainty (measured by 5-95% confidence intervals) in SPEI-3 mean (MEAN) (a,c,e) and standard deviation (SD) (b,d,f) changes under the 2.0°C warming target relative to 1.5°C warming target for RCP2.6, RCP4.5, RCP8.5 scenarios.



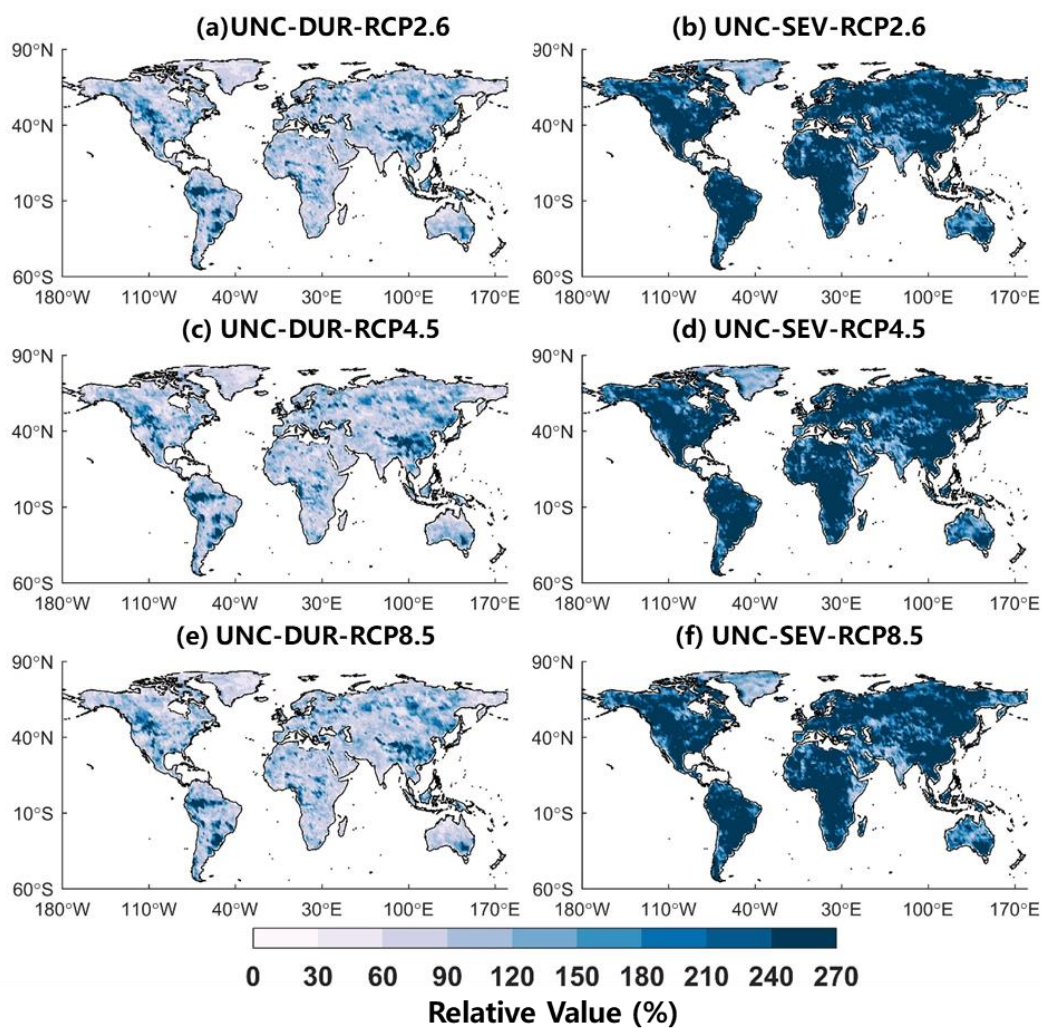

**Figure S11 Uncertainty for drought duration and severity changes under the 1.5°C warming target**

Maps of the projected uncertainty (measured by 5-95% confidence intervals) in drought duration (DUR) (a,c,e) and severity (SEV) (b,d,f) changes under the 1.5°C warming target relative to historical period (1976-2000) for RCP2.6, RCP4.5, RCP8.5 scenarios.



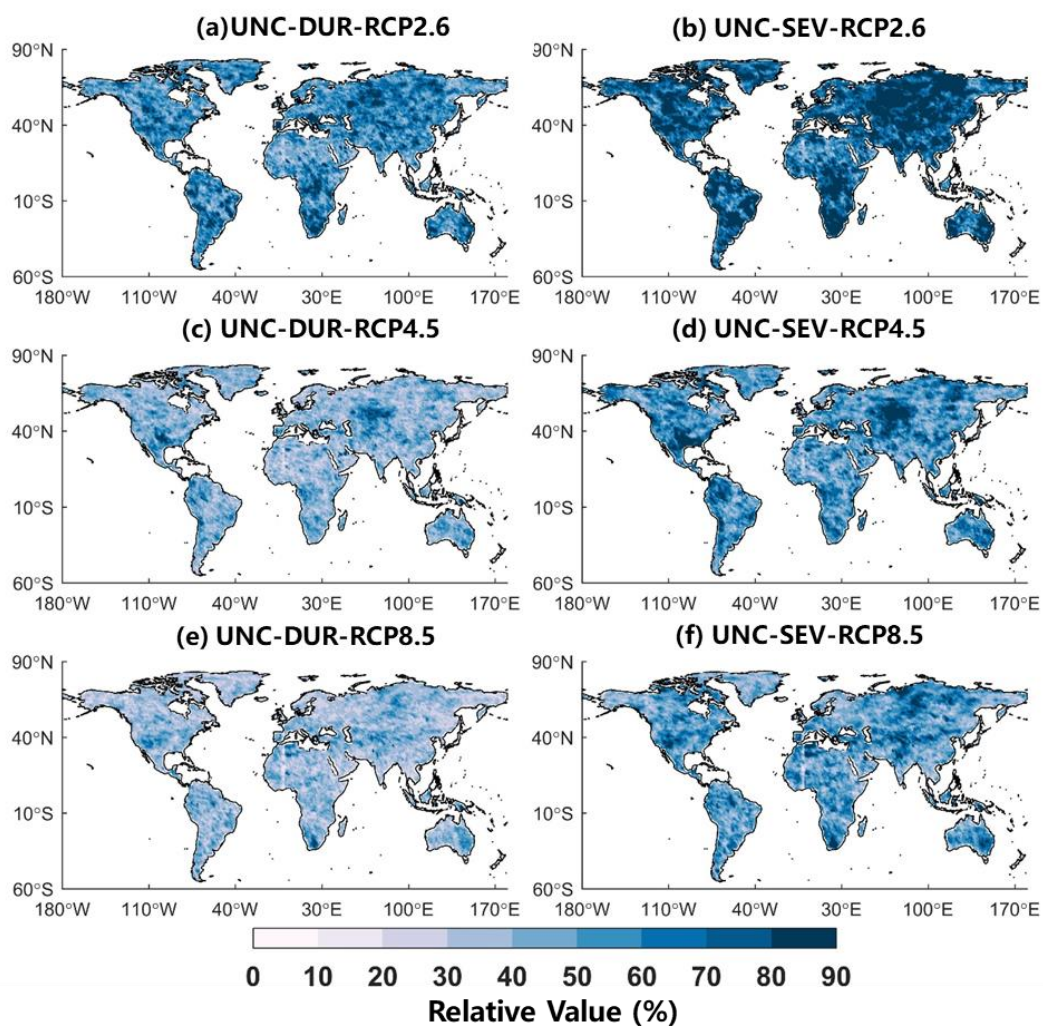

**Figure S12 Uncertainty for drought duration and severity changes between the 1.5°C and 2.0°C warming target**

Maps of the projected uncertainty (measured by 5-95% confidence intervals) in drought duration (DUR) (a,c,e) and severity (SEV) (b,d,f) changes under the 2.0°C warming target relative to 1.5°C warming target for RCP2.6, RCP4.5, RCP8.5 scenarios.

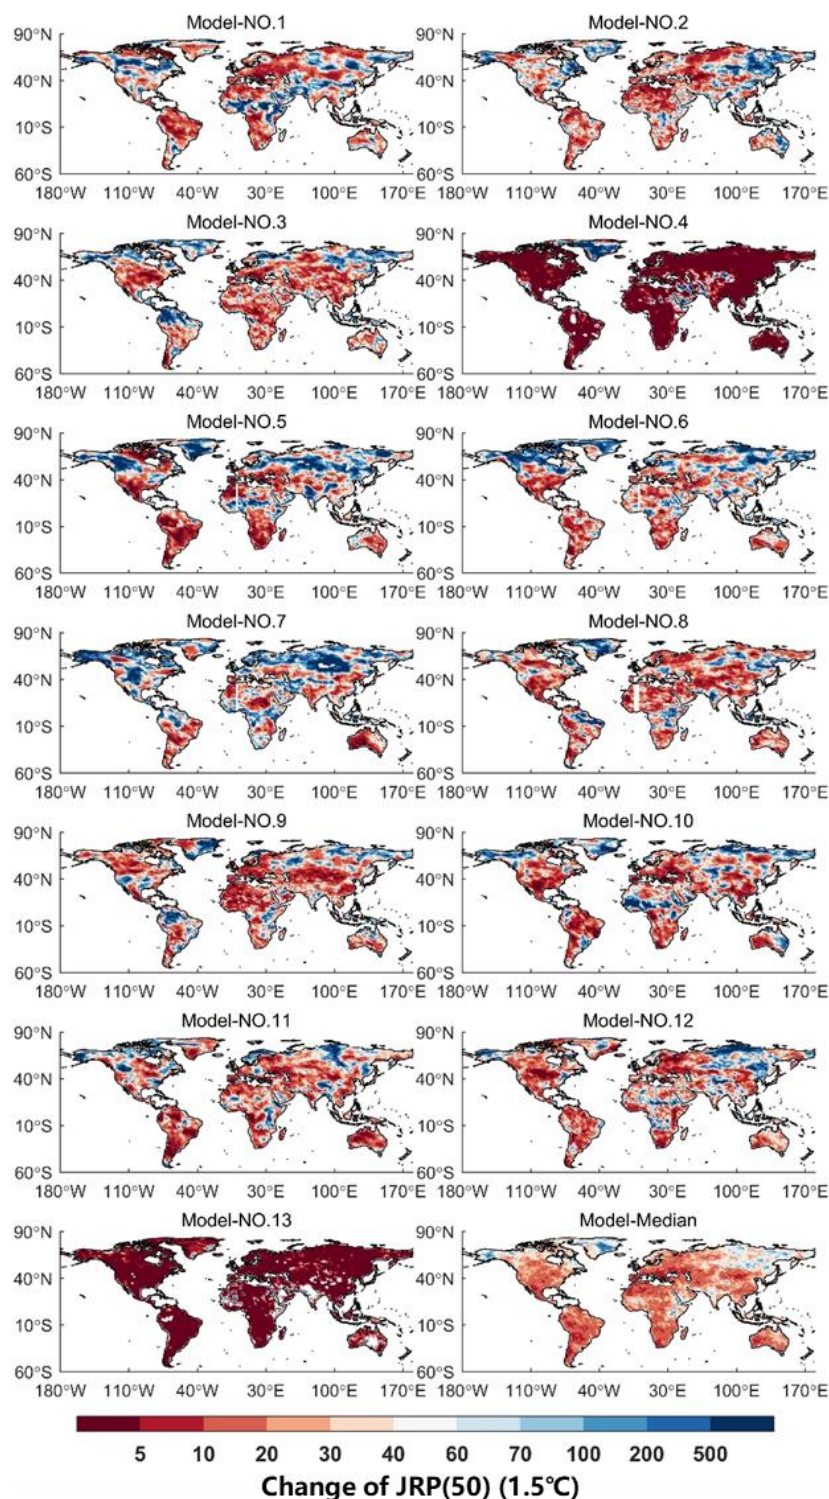

**Figure S13 Model uncertainty for changes of 50-year joint return period (JRP) under the 1.5°C warming target**

Maps of the single model (Model-NO.1-Model-NO.13) and multi-model ensemble median (Model-Median) changes of the historical (1976-2005) 50-year joint return period under the 1.5°C warming target for RCP4.5 scenario.



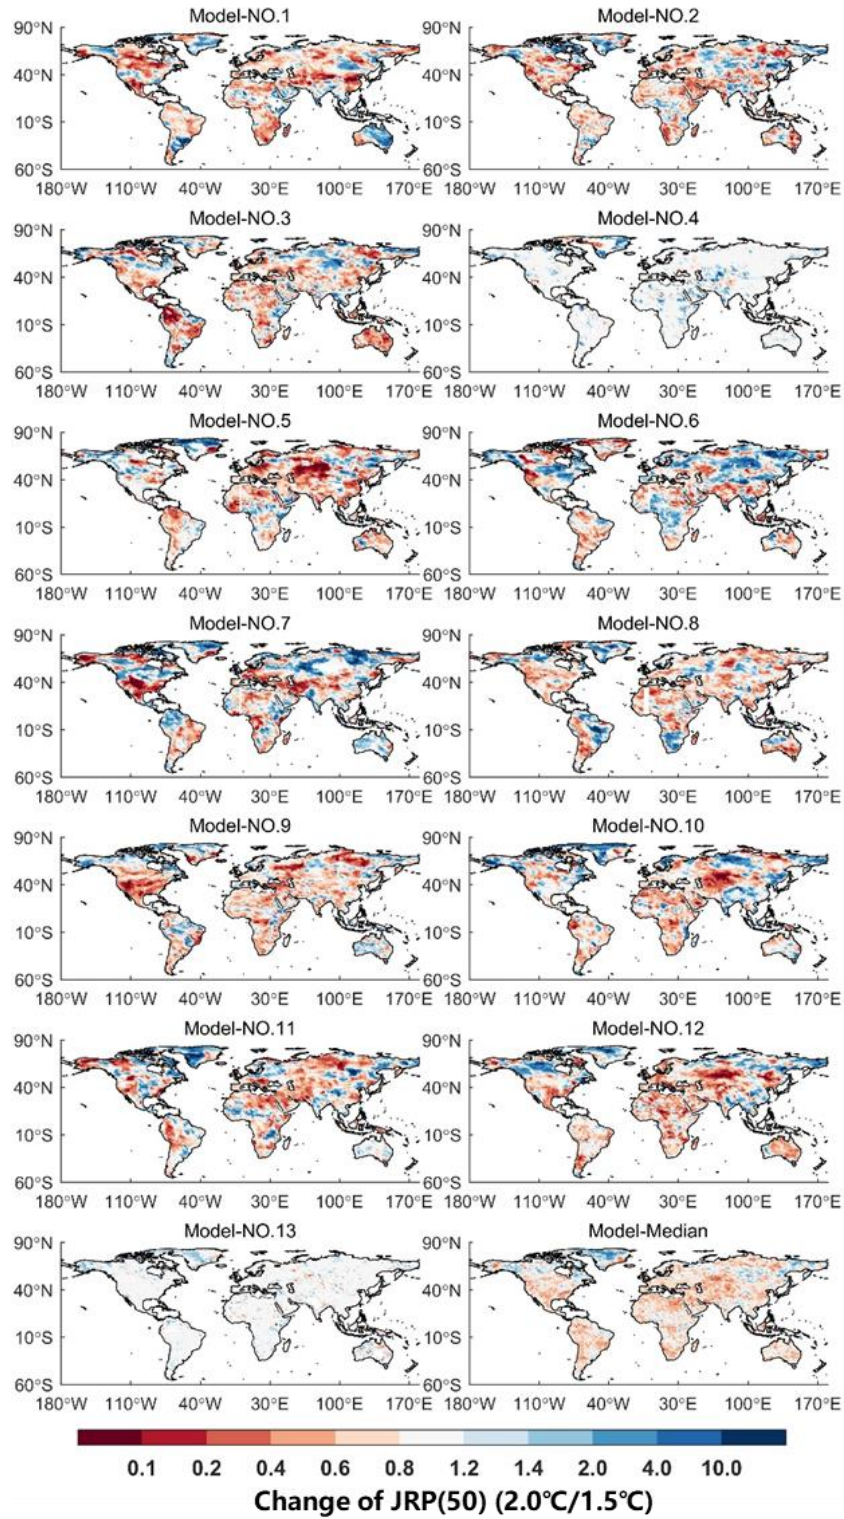

**Figure S14 Model uncertainty for changes of 50-year joint return period (JRP) between the 1.5°C and 2.0°C warming target**

Maps of the single model (Model-NO.1-Model-NO.13) and multi-model ensemble median (Model-Median) changes of the historical (1976-2005) 50-year joint return period under the 2.0°C warming target relative to 1.5°C warming target for RCP4.5 scenario.

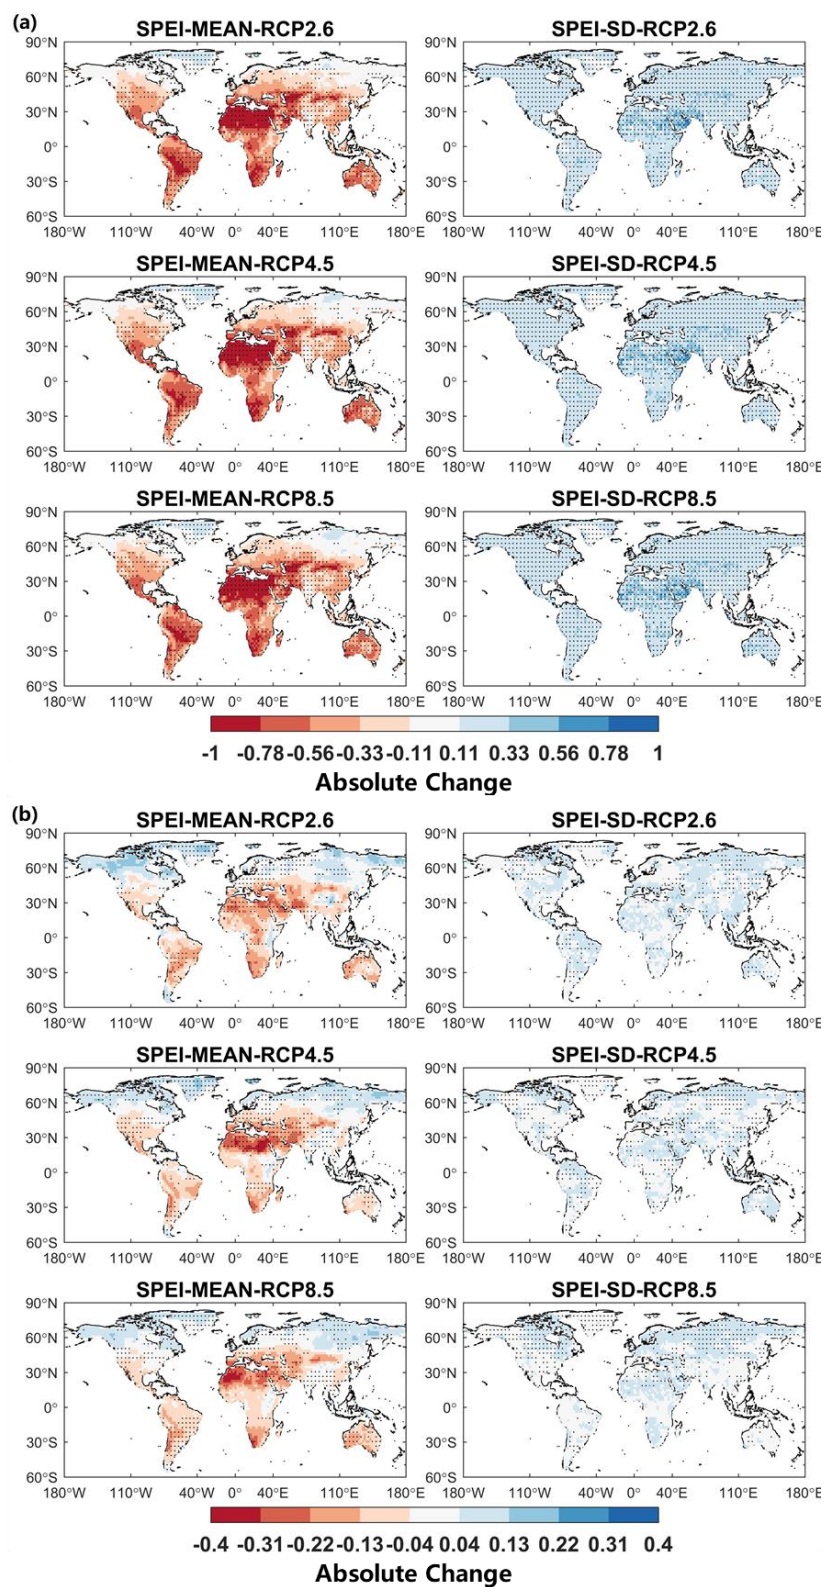

**Figure S15** Projected changes in the mean and standard deviation of SPEI under the 1.5°C (a) and between the 1.5°C and 2.0°C (b) warming target at 2° spatial resolution



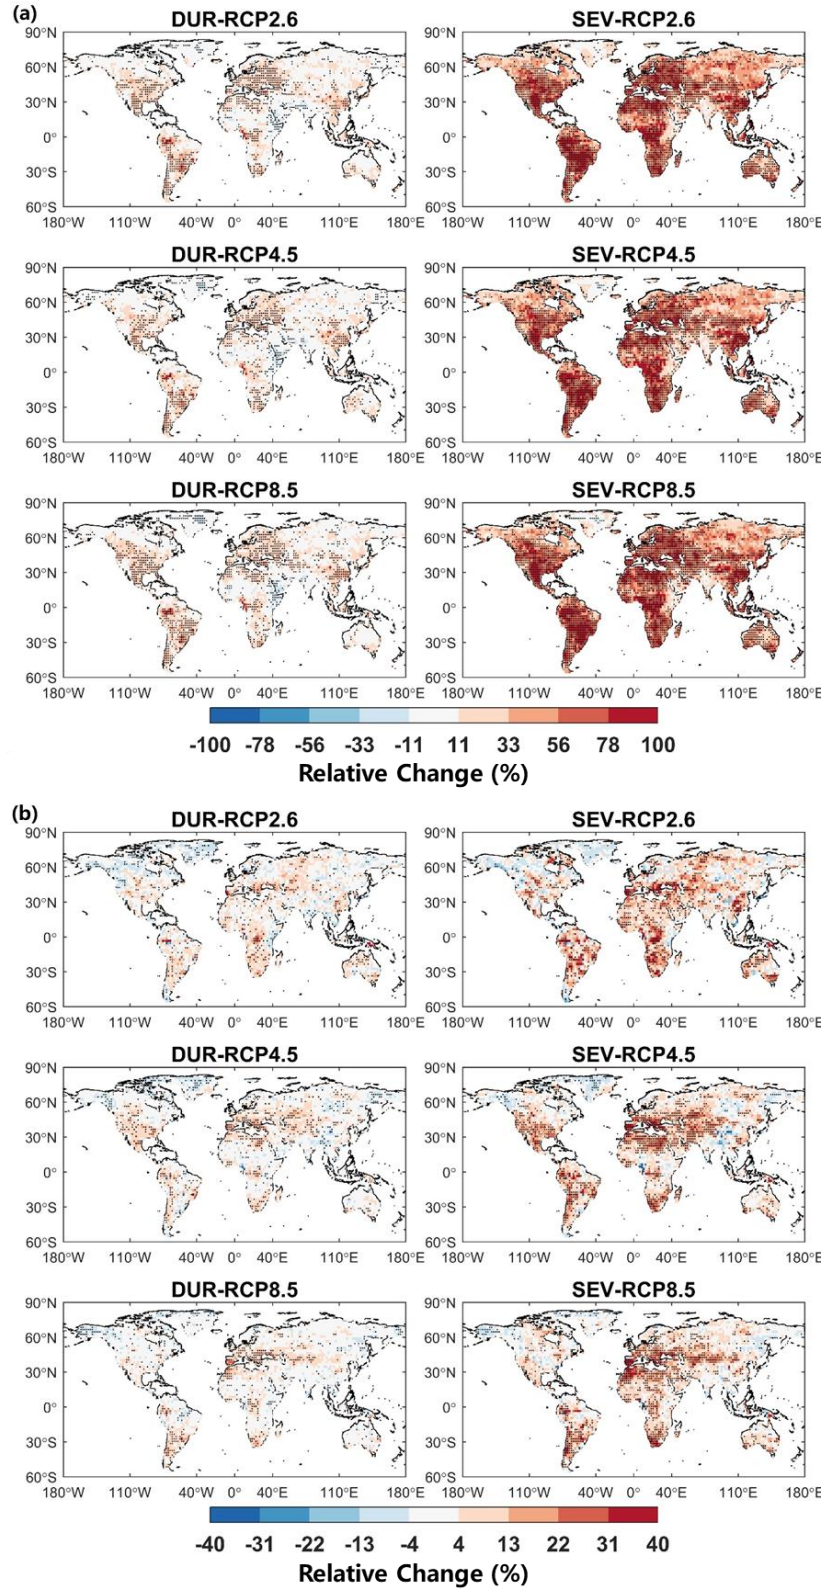

**Figure S16 Projected changes in drought duration and severity under the 1.5°C (a) and between the 1.5°C and 2.0°C (b) warming target at 2° spatial resolution**



**Table S1 Summary statistic table for changes in major variables**

| <b>Summary statistic</b>      |                                                                                                   |              |                                 |
|-------------------------------|---------------------------------------------------------------------------------------------------|--------------|---------------------------------|
| <b>Variable</b>               | <b>Explanation</b>                                                                                | <b>1.5°C</b> | <b>2-1.5(°C) <sup>(1)</sup></b> |
| <b>SPEI<sub>3</sub>(Mean)</b> | Percentage of continental areas for decreasing mean SPEI <sub>3</sub>                             | 85%          | 58%                             |
| <b>SPEI<sub>3</sub>(SD)</b>   | Percentage of continental areas for increasing standard deviation of SPEI <sub>3</sub>            | 100%         | 95%                             |
| <b>Drought duration</b>       | Percentage of continental areas for increasing mean drought duration                              | 78%          | 65%                             |
| <b>Drought severity</b>       | Percentage of continental areas for increasing mean drought severity                              | 99%          | 84%                             |
| <b>50-year JRP</b>            | Percentage of continental areas for increasing occurrence of 50-year drought events               | 88%          | 71%                             |
| <b>GDP exposure</b>           | The number of countries exhibit a 100% fraction in GDP exposed to increasing drought risks        | 73           | 17                              |
| <b>Population exposure</b>    | The number of countries exhibit a 100% fraction in population exposed to increasing drought risks | 75           | 17                              |

Notes:

(1) 2-1.5(°C) means differences in effects between the 1.5°C and 2.0°C warming levels.

**Table S2 Several countries suffering decreasing population and GDP exposure**

| Land fraction exposing to more frequent droughts |         |         |         |         |         |         |         |         |         |
|--------------------------------------------------|---------|---------|---------|---------|---------|---------|---------|---------|---------|
| 1.5°C                                            |         |         | 2°C     |         |         | 2-1.5°C |         |         |         |
| Country                                          | SSP126  | SSP245  | SSP585  | SSP126  | SSP245  | SSP585  | SSP126  | SSP245  | SSP585  |
| Canada                                           | 68.35%  | 68.82%  | 71.56%  | 55.58%  | 63.36%  | 66.92%  | -12.77% | -5.46%  | -4.63%  |
| United States                                    | 86.17%  | 78.93%  | 86.89%  | 85.44%  | 80.02%  | 79.84%  | -0.72%  | 1.08%   | -7.05%  |
| Colombia                                         | 85.71%  | 84.62%  | 79.12%  | 75.82%  | 93.41%  | 85.71%  | -9.89%  | 8.79%   | 6.59%   |
| Japan                                            | 62.16%  | 56.76%  | 62.16%  | 59.46%  | 62.16%  | 62.16%  | -2.70%  | 5.41%   | 0.00%   |
| Population (million)                             |         |         |         |         |         |         |         |         |         |
| 1.5°C                                            |         |         | 2°C     |         |         | 2-1.5°C |         |         |         |
| Country                                          | SSP126  | SSP245  | SSP585  | SSP126  | SSP245  | SSP585  | SSP126  | SSP245  | SSP585  |
| Canada                                           | 7.97    | 7.91    | 8.27    | 10.50   | 8.95    | 9.57    | 2.53    | 1.04    | 1.30    |
| United States                                    | 59.13   | 58.82   | 60.75   | 73.56   | 64.86   | 68.20   | 14.43   | 6.05    | 7.45    |
| Colombia                                         | 9.41    | 9.67    | 9.33    | 10.20   | 10.84   | 9.88    | 0.79    | 1.17    | 0.56    |
| Japan                                            | 17.82   | 17.63   | 18.12   | 15.48   | 16.53   | 17.95   | -2.34   | -1.11   | -0.17   |
| GDP (billion USD, 2010price PPP)                 |         |         |         |         |         |         |         |         |         |
| 1.5°C                                            |         |         | 2°C     |         |         | 2-1.5°C |         |         |         |
| Country                                          | SSP126  | SSP245  | SSP585  | SSP126  | SSP245  | SSP585  | SSP126  | SSP245  | SSP585  |
| Canada                                           | 373.60  | 373.74  | 398.99  | 719.26  | 499.22  | 563.41  | 345.67  | 125.48  | 164.41  |
| United States                                    | 3639.14 | 3517.35 | 3759.94 | 6699.26 | 4554.66 | 5118.33 | 3060.12 | 1037.32 | 1358.38 |
| Colombia                                         | 192.32  | 184.47  | 191.51  | 617.84  | 296.93  | 311.37  | 425.52  | 112.46  | 119.86  |
| Japan                                            | 575.07  | 553.76  | 590.57  | 873.40  | 620.73  | 730.21  | 298.33  | 66.97   | 139.63  |
| Population Exposure Fraction                     |         |         |         |         |         |         |         |         |         |
| 1.5°C                                            |         |         | 2°C     |         |         | 2-1.5°C |         |         |         |
| Country                                          | SSP126  | SSP245  | SSP585  | SSP126  | SSP245  | SSP585  | SSP126  | SSP245  | SSP585  |
| Canada                                           | 99.25%  | 98.88%  | 98.77%  | 99.14%  | 98.32%  | 98.70%  | -0.11%  | -0.56%  | -0.07%  |
| United States                                    | 99.84%  | 99.60%  | 99.85%  | 99.82%  | 99.85%  | 99.84%  | -0.02%  | 0.26%   | -0.01%  |
| Colombia                                         | 84.83%  | 77.64%  | 46.20%  | 57.22%  | 98.90%  | 80.06%  | -27.61% | 21.26%  | 33.87%  |
| Japan                                            | 99.72%  | 97.95%  | 99.78%  | 72.89%  | 98.65%  | 99.78%  | -26.82% | 0.70%   | 0.00%   |
| GDP Exposure Fraction                            |         |         |         |         |         |         |         |         |         |
| 1.5°C                                            |         |         | 2°C     |         |         | 2-1.5°C |         |         |         |
| Country                                          | SSP126  | SSP245  | SSP585  | SSP126  | SSP245  | SSP585  | SSP126  | SSP245  | SSP585  |
| Canada                                           | 99.26%  | 98.89%  | 98.79%  | 99.15%  | 98.34%  | 98.72%  | -0.11%  | -0.55%  | -0.07%  |
| United States                                    | 99.84%  | 99.59%  | 99.85%  | 99.82%  | 99.85%  | 99.84%  | -0.02%  | 0.26%   | -0.01%  |
| Colombia                                         | 84.85%  | 77.67%  | 46.27%  | 57.27%  | 98.90%  | 80.09%  | -27.58% | 21.23%  | 33.82%  |
| Japan                                            | 99.72%  | 97.95%  | 99.78%  | 72.89%  | 98.65%  | 99.78%  | -26.82% | 0.70%   | 0.00%   |
